# Supplementary material
Source: Springer Nature journal article supplement (https://www.springermedizin.de/resource/supplementary/12960_2010_256_MOESM3_ESM.pdf/9570754)
Supplement: MOESM3 [file 9570754]

**SECRETARIAT OF LABOR AND  
EDUCATION MANAGEMENT IN  
HEALTH (SGTES)**

**National Coordination for  
Planning and Budget**

**Department of Labor Issues and  
Regulation of Practice in Health**

**Program  
directorate**

**Department of Education and  
Management in Health (DEGES)**

**General  
Coordination of  
Labor Regulation  
and Negotiation**

**General  
Coordination  
Regulation of  
Labor  
Management**

**HR  
Observatories  
Network**

**General Program  
on Management  
Capacity Building**

**General  
Coordination for  
Health Education  
Strategic Actions**

**National  
Coordination for  
Technical Actions  
in Health  
Education**
